# Supplementary material for: Relationships between test positivity rate, total laboratory confirmed cases of malaria, and malaria incidence in high burden settings of Uganda: an ecological analysis
Source: PubMed Central journal article supplement (PMC7805073; doi:10.1186/s12936-021-03584-7), 2021-01-13

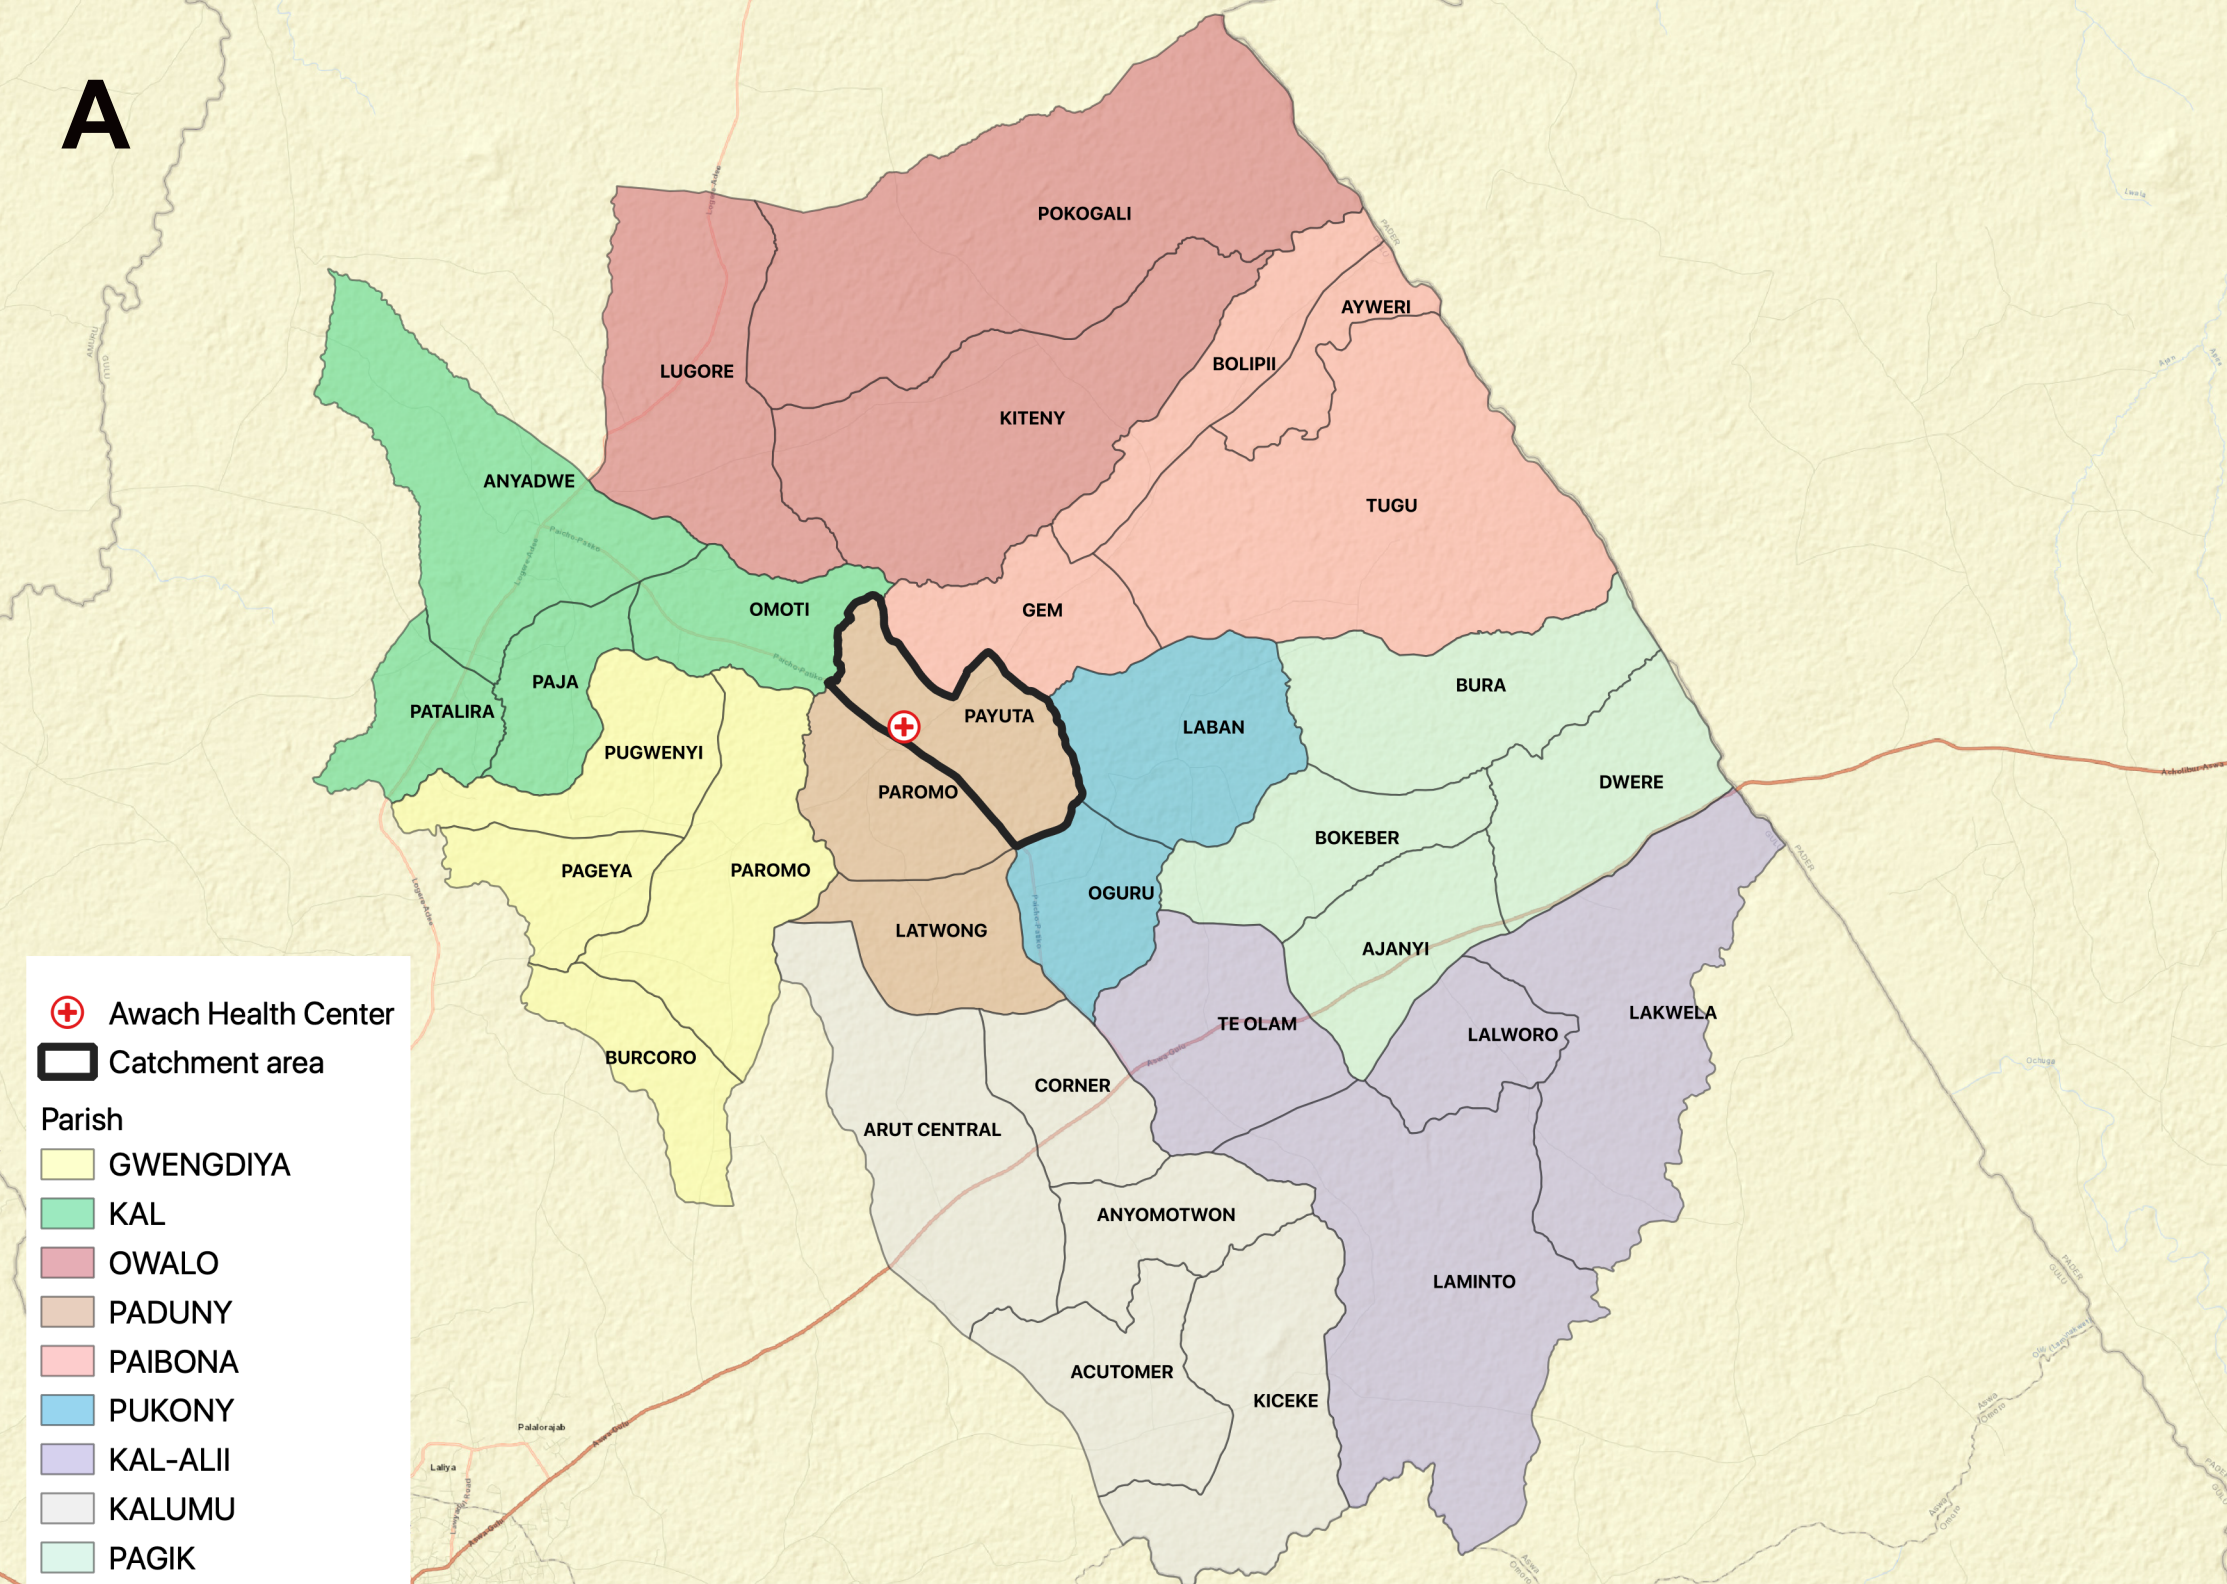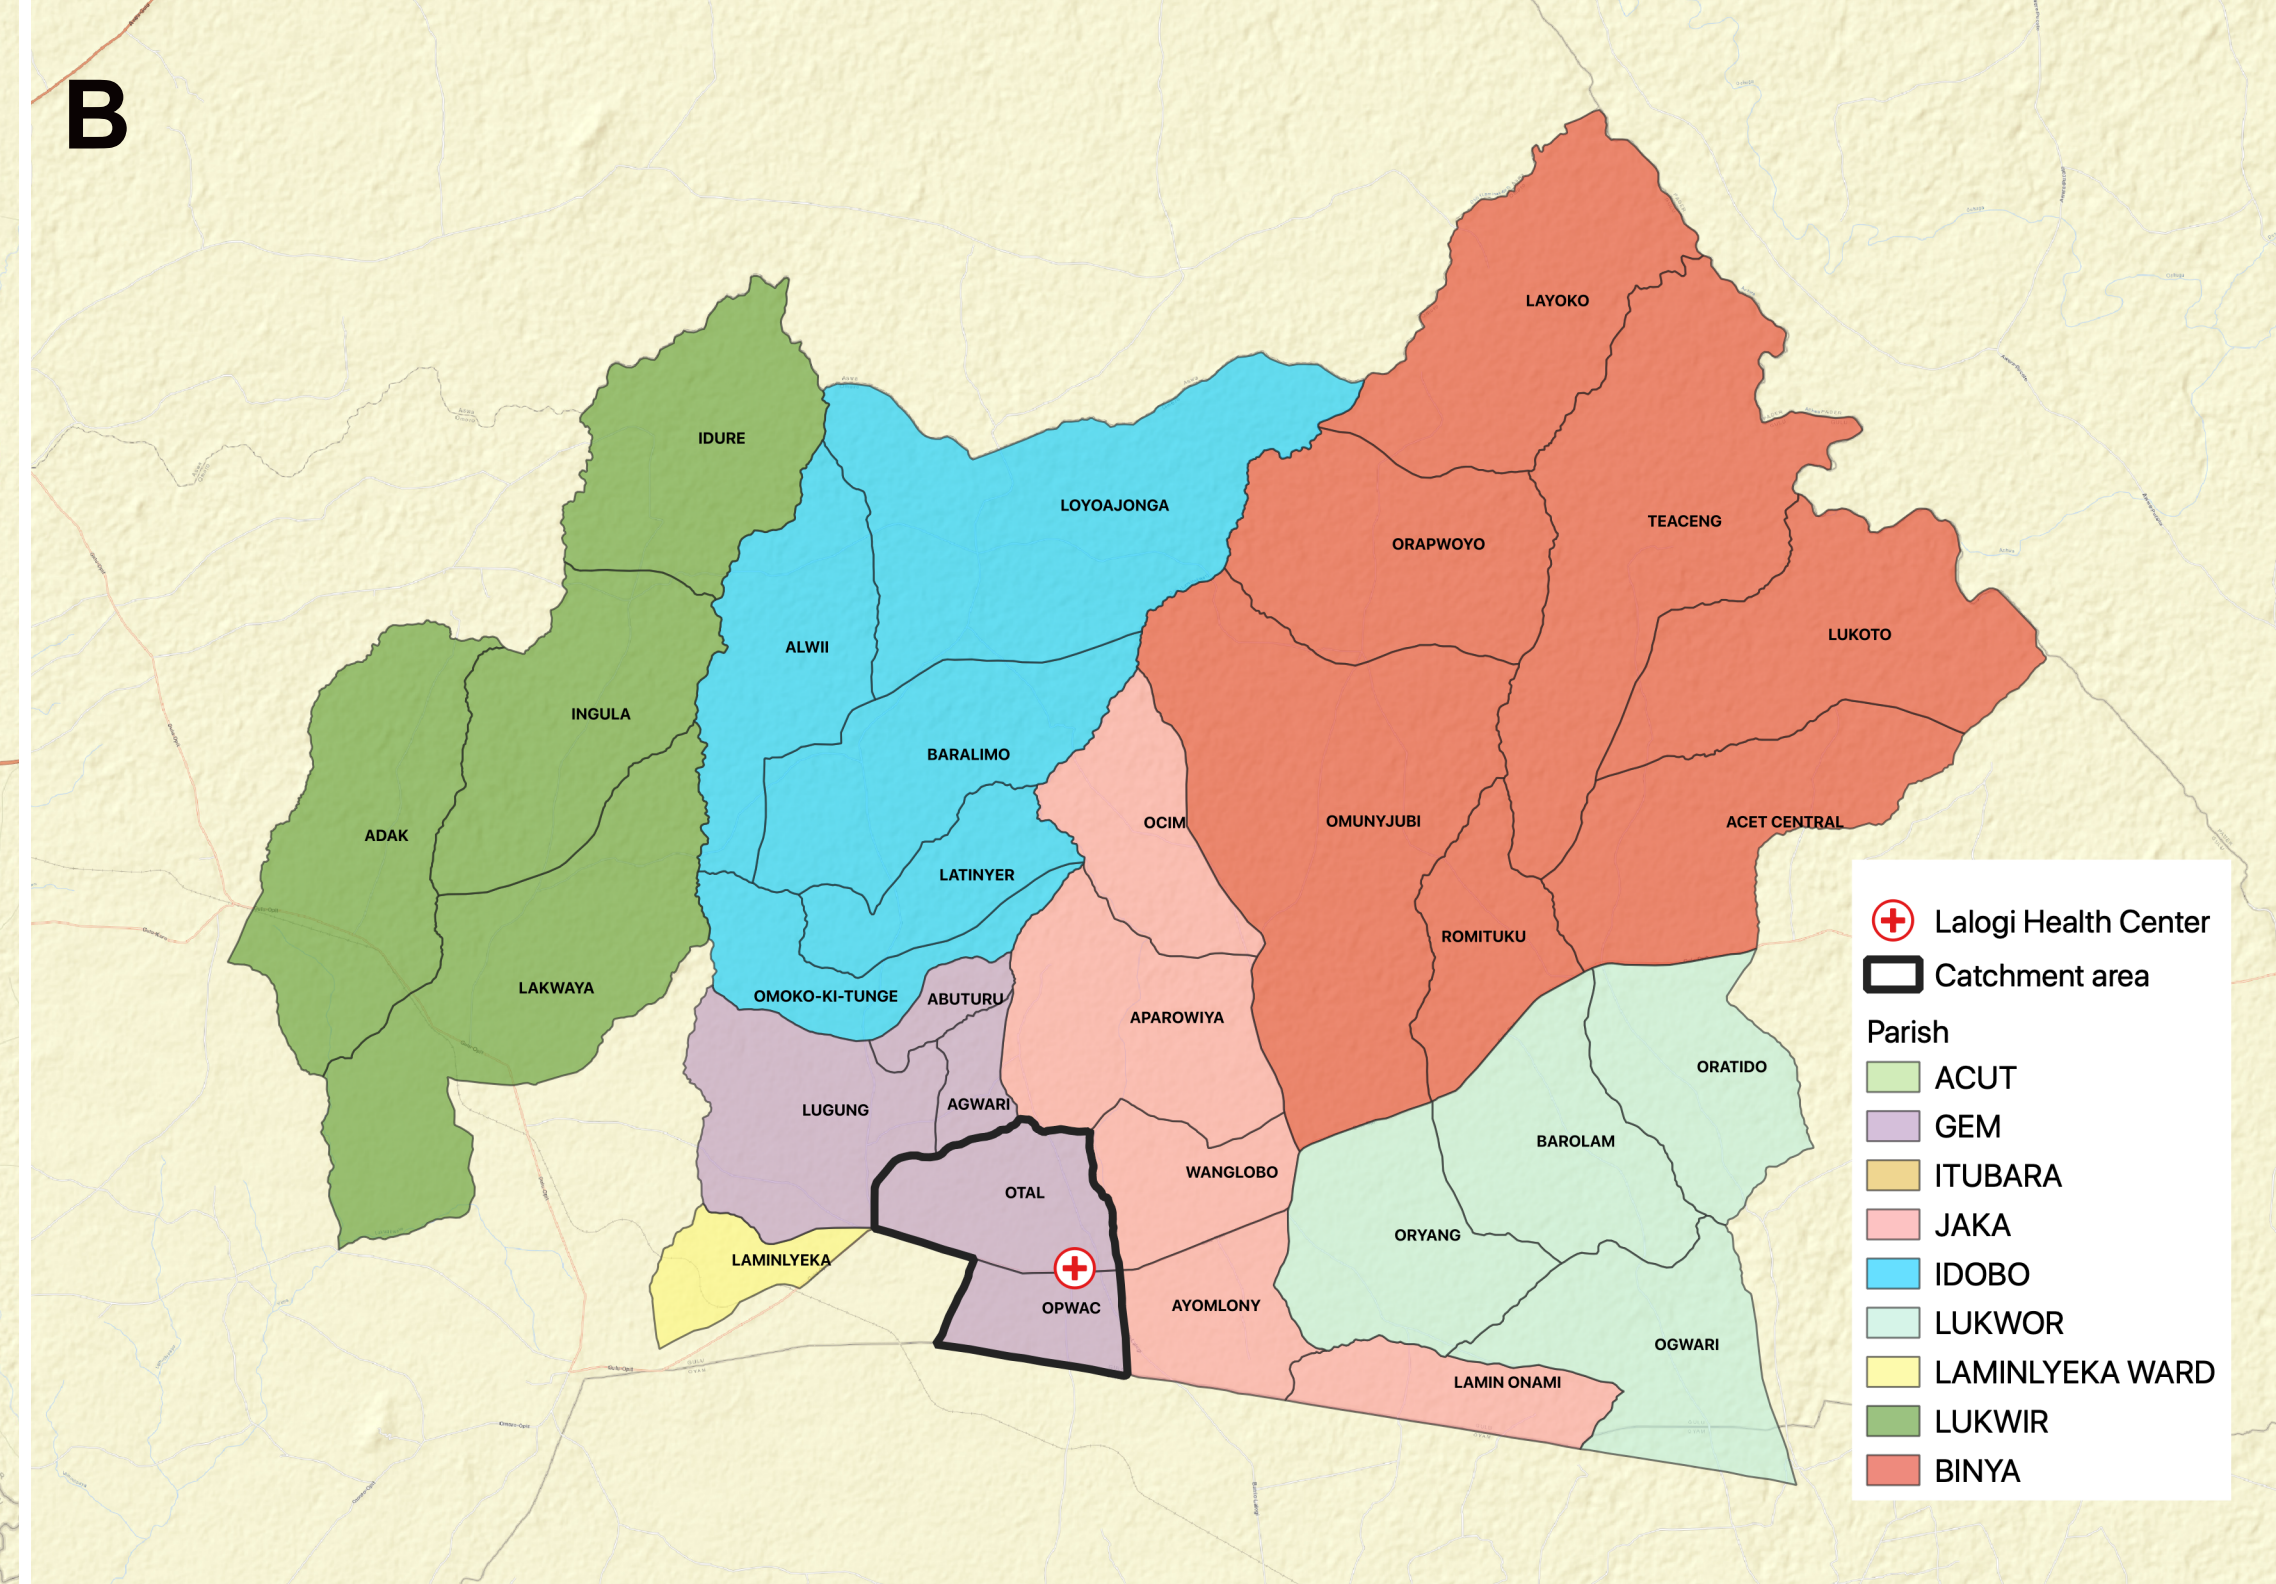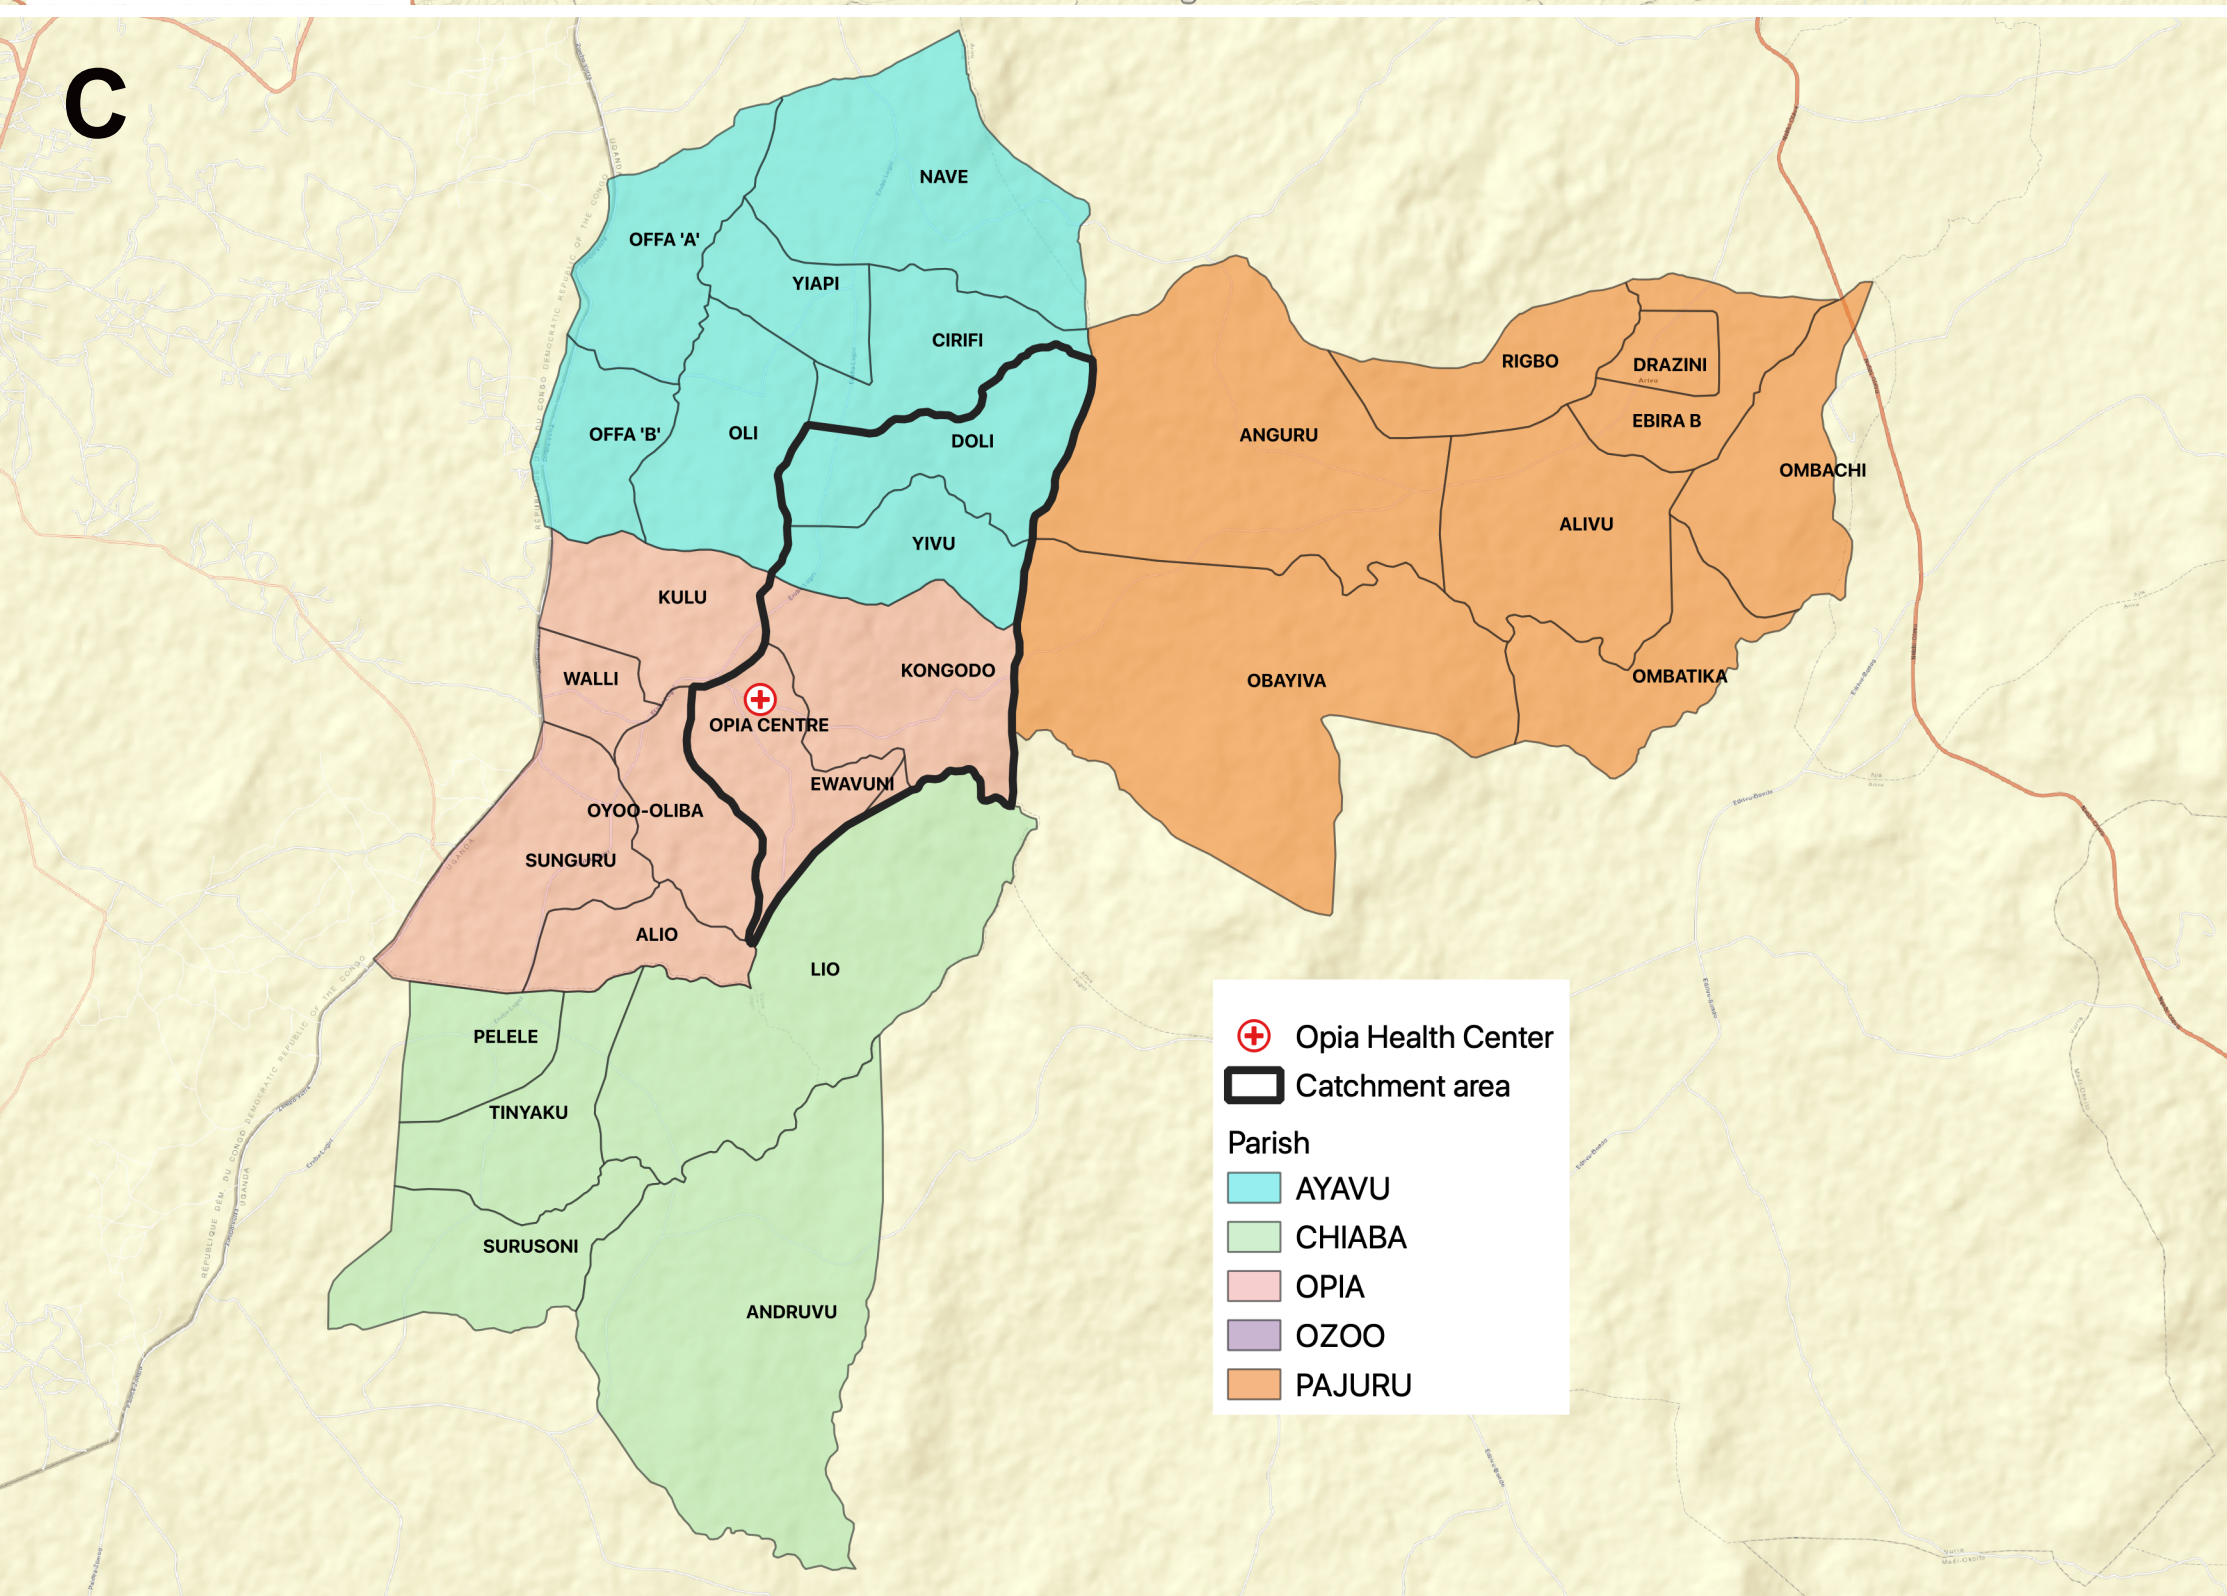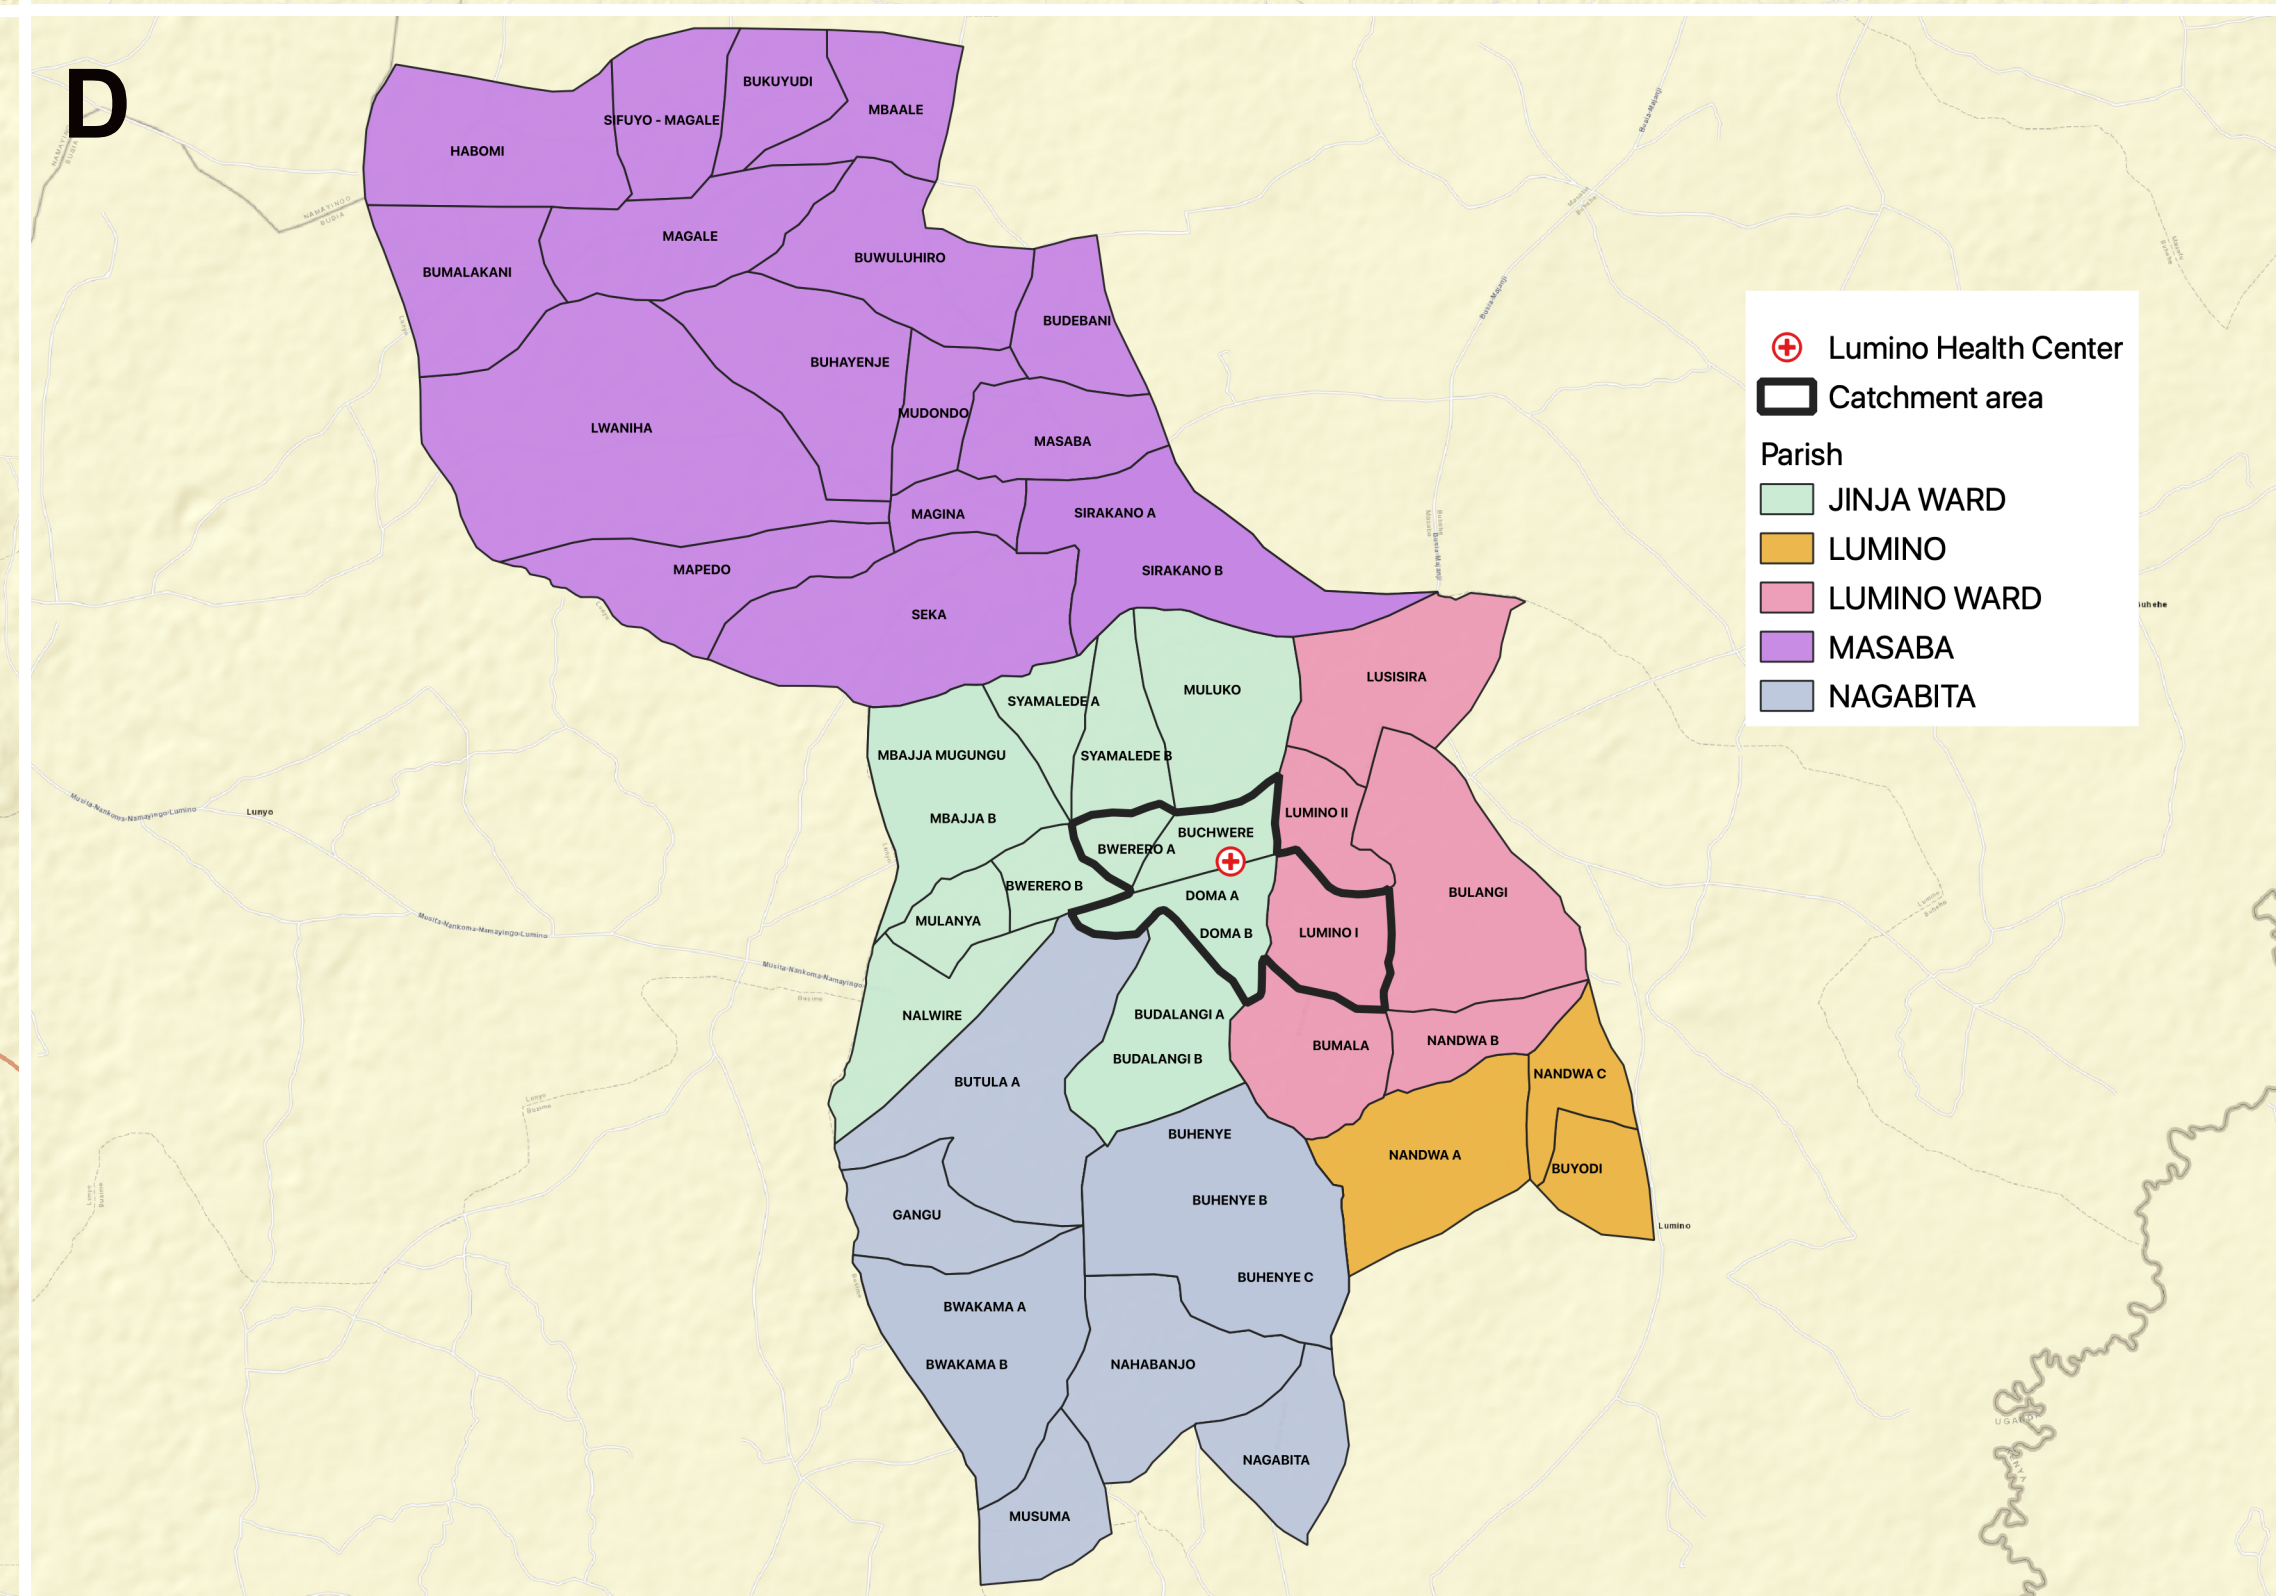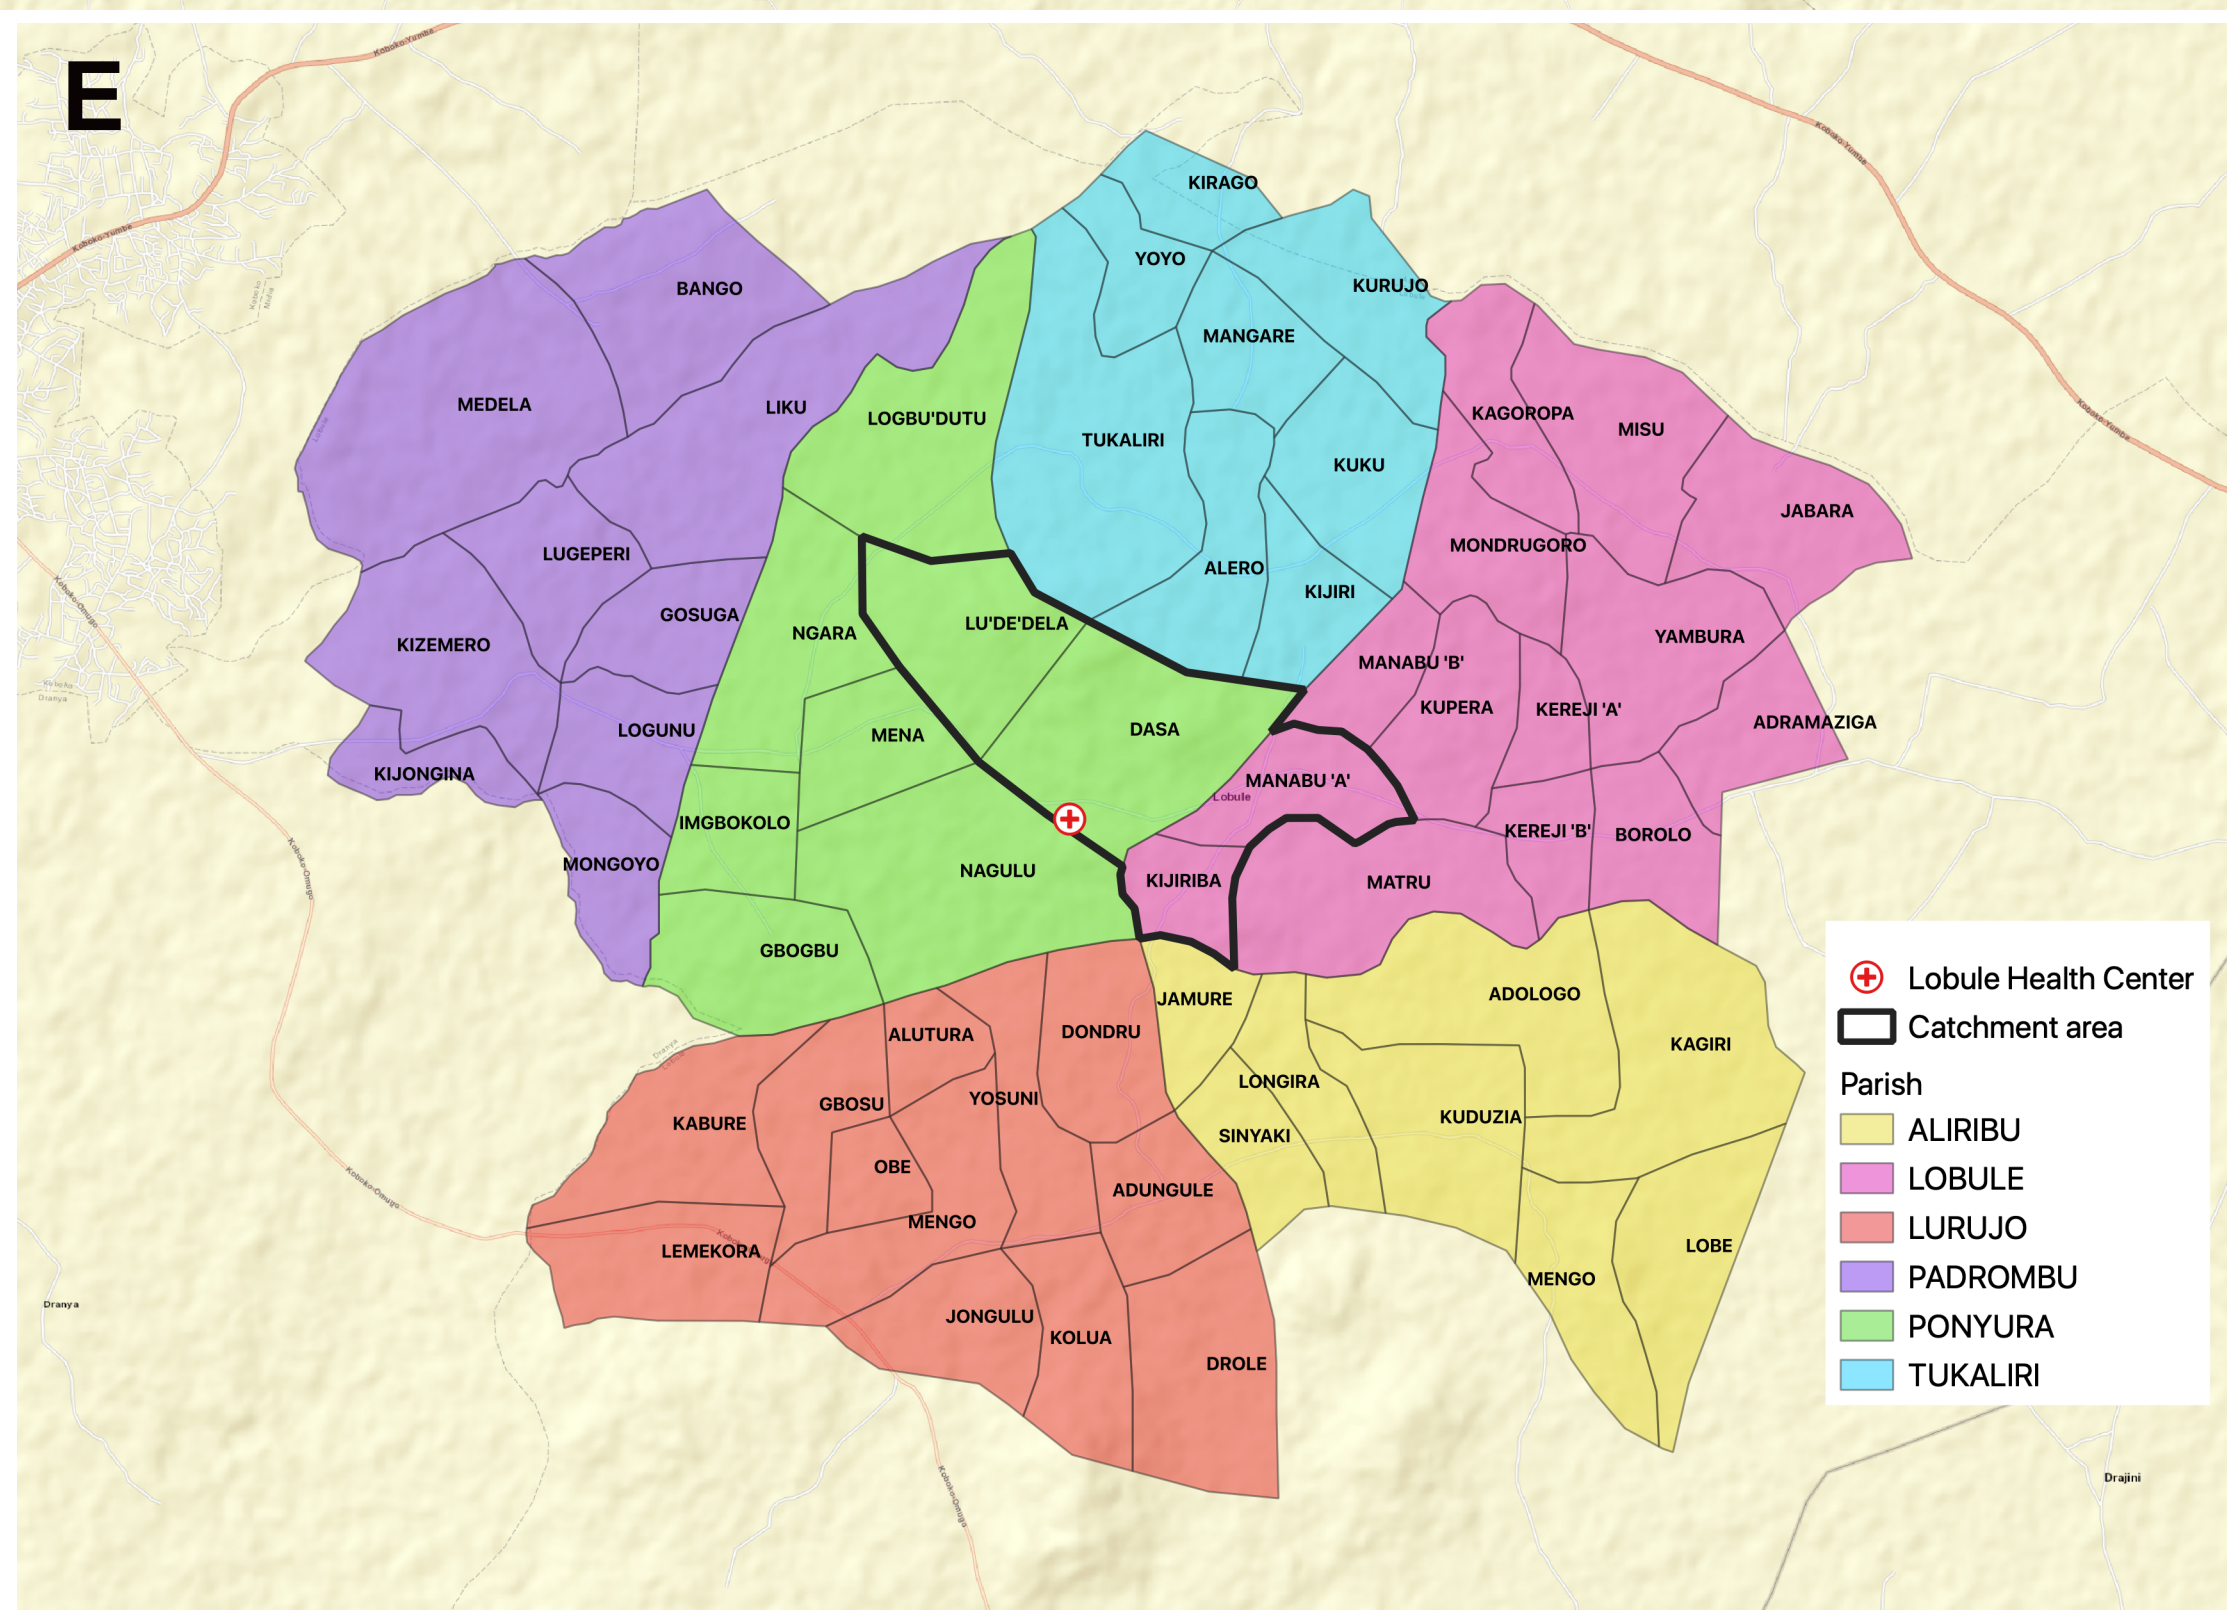

Supplement: 12936_2021_3584_MOESM2_ESM.pdf [file 12936_2021_3584_MOESM2_ESM.pdf]
